# Supplementary material for: GC-MS and LC-MS Pesticide Analysis of Black Teas Originating from Sri Lanka, Iran, Turkey, and India
Source: MDPI journal article supplement (doi:10.3390/toxics11010034), 2022-12-30
Supplement: s1 [file s1]

**Table S1.** List of pesticide compounds analyzed by LC-MS / MS in tea

|                                                                                                                                                                                                                                                                                                                                                                                                                                                                                                                                                                                                                                                                                                                                                                                                                                                                                                                                                                                                                                                                                                                                                                                                                                                                                                                                                                                                                                                                                                                                                                                                                                                                                                                                                                                                                                                                                                                                                                                                                                                                                                                                                                                                                                                                                                                                                                                                                                                                                                                                                                                                                                                                                                                                                                                                                                                                       |
|-----------------------------------------------------------------------------------------------------------------------------------------------------------------------------------------------------------------------------------------------------------------------------------------------------------------------------------------------------------------------------------------------------------------------------------------------------------------------------------------------------------------------------------------------------------------------------------------------------------------------------------------------------------------------------------------------------------------------------------------------------------------------------------------------------------------------------------------------------------------------------------------------------------------------------------------------------------------------------------------------------------------------------------------------------------------------------------------------------------------------------------------------------------------------------------------------------------------------------------------------------------------------------------------------------------------------------------------------------------------------------------------------------------------------------------------------------------------------------------------------------------------------------------------------------------------------------------------------------------------------------------------------------------------------------------------------------------------------------------------------------------------------------------------------------------------------------------------------------------------------------------------------------------------------------------------------------------------------------------------------------------------------------------------------------------------------------------------------------------------------------------------------------------------------------------------------------------------------------------------------------------------------------------------------------------------------------------------------------------------------------------------------------------------------------------------------------------------------------------------------------------------------------------------------------------------------------------------------------------------------------------------------------------------------------------------------------------------------------------------------------------------------------------------------------------------------------------------------------------------------|
| 4-D, 2,4-DB, 2-2-Naphthylloxyacetic acid, 3,4,5-Trimethacarb, 3-Hydroxycarbofuran, 4-CPA5-Hydroxy-clethodim-sulfone, 5-Hydroxy-imidacloprid, 5-Hydroxy-thiabendazol, 6-Chlor-3-phenyl-pyridazin-4-ol (Pyridate-Metabolit), Acephate, Acequinocyl, Acetamiprid, Acetochlor, Acibenzolar-S-methyl, Acifluorfen, Aclonifen, Acrinathrin, Alachlor, Aldicarb-sulfoxid, Aldoxycarb, Alloxydim, Ametryn, Amidosulfuron, Aminocarb, Aminopyralid, Amitraz, Amitrol, AMPA (Aminomethyl phosphonic acid), Anilazine, Anilofos, Aramite, Atrazin, Atrazine-2-hydroxy, Atrazine-desethyl, Atrazine-desethyl-2-hydroxy, Atrazine-desisopropyl, Avermectin B1a, Azaconazole, Azamethiophos, Azimsulfuron, Azinphos-ethyl, Azinphos-methyl, Azoxystrobin, Beflubutamid, Benalaxyl, Benazolin, Bendiocarb, Benfuracarb, Benfuresate, Benomyl, Benoxacor, Bensulfuron-methyl, Bensulide, Bensultap, Bentazone, Benzoximate, Bifenazate, Bifenox, Bifenthrin, Bioresmethrin, Bitertanol, Boscalid, Brodifacoum, Bromacil, Bromadiolone, Bromophos, Bromophos-ethyl, Bromoxynil, Bromuconazole, Bupirimate, Buprofezin, Butafenacil, Butocarboxim-sulfoxid, Butoxycarboxim, Butralin, Buturon, Butylate, Cadusafos, Carbaryl, Carbendazim, Carbetamide, Carbofuran, Carbosulfan, Carboxin, Carfentrazoneethyl, Carpropamid, Cartap, Chinomethionate, Chlorbromuron, Chlorbufam, Chlorethoxyfos-oxon, Chlorfenvinphos, Chlorfluazuron, Chloridazon, Chlorimuron-ethyl, Chlormephos, Chlorophacinone, Chlorotoluron, Chloroxuron, Chlorpropham, Chlorpyrifos, Chlorpyrifos-methyl, Chlorsulfuron, Chlorthiamid, Chlorthiophos, Cinerin, ICinerin, IICinidon-ethyl, Cinosulfuron, Clethodim, Clethodim-imin-sulfone, Clethodim-imin-sulfoxide, Clethodim-sulfone, Clethodim-sulfoxide, Clodinafop-propargyl, Clofentezine, Clomazone, Clomeprop, Clopyralid, Cloquintocet-mexyl, Clothianidin, Coumaphos, Coumatetralyl, Crotoxyphos, Cyanazine, Cyanofenphos, Cyanophos, Cyazofamid, Cyclanilide, Cycloate, Cycloxydim, Cyfluthrin, Cyhalofop-butyl, Cymoxanil, Cypermethrin, Cyphenothrin, Cyproconazole, Cyprodinil, Cyromazine, Daminozide, Deltamethrin, Demeton-S-methyl, Demeton-S-methyl-sulfon, Desmedipham, Desmethyl-formamido-pirimicarb, Desmethyl-pirimicarb, Desmetryne, Dialifos, Di-allate, Diazinon, Dichlofenthion, Dichlofluanid, Dichlorprop-P, Dichlorvos, Diclobutrazol, Diclofop-methyl, Dicloran, Diclosulam, Dicrotophos, Dicyclanil, Diethofencarb, Difenacoum, Difenoconazole, Difenoxuron, Difenzoquat, Diflubenzuron, Diflufenican, Diflufenzopyr, Dimefuron, Dimepiperate, Dimethachlor, Dimethametryn, Dimethenamide, Dimethoate, Dimethomorph, Dimetilan, Dimoxystrobin, Diniconazole, Dinoseb, Dinoterb, Dioxathion, Diphacinone, Diphenamid, Diphenylamine, Diquat, Dithianon, Dithiopyr, Diuron, DNOC, Dodemorph, Dodine, Edifenphos, Endosulfan, EPN, |
|-----------------------------------------------------------------------------------------------------------------------------------------------------------------------------------------------------------------------------------------------------------------------------------------------------------------------------------------------------------------------------------------------------------------------------------------------------------------------------------------------------------------------------------------------------------------------------------------------------------------------------------------------------------------------------------------------------------------------------------------------------------------------------------------------------------------------------------------------------------------------------------------------------------------------------------------------------------------------------------------------------------------------------------------------------------------------------------------------------------------------------------------------------------------------------------------------------------------------------------------------------------------------------------------------------------------------------------------------------------------------------------------------------------------------------------------------------------------------------------------------------------------------------------------------------------------------------------------------------------------------------------------------------------------------------------------------------------------------------------------------------------------------------------------------------------------------------------------------------------------------------------------------------------------------------------------------------------------------------------------------------------------------------------------------------------------------------------------------------------------------------------------------------------------------------------------------------------------------------------------------------------------------------------------------------------------------------------------------------------------------------------------------------------------------------------------------------------------------------------------------------------------------------------------------------------------------------------------------------------------------------------------------------------------------------------------------------------------------------------------------------------------------------------------------------------------------------------------------------------------------|

Epoxiconazole, EPTC, Esfenvalerate, Ethametsulfuron-methyl, Ethidimuron, Ethiofencarb, Ethiofencarb-sulfon, Ethiofencarb- Fenamidone, Fenamiphos, Fenarimol, Fenazaquin, Fenbuconazole, Fenfuram, Fenhexamid, Fenitrothion, Fenobucarb, Fenoprop, Fenothiocarb, Fenoxaprop-ethyl, Fenoxycarb, Fenciclonil, Fenpropathrin, Fenpropidin, Fenpropimorph, Fenpyroximate, Fenthion, Fentin, Fenuron, Fenvalerate, Fipronil, Fipronil-desulfinyl, Fipronil-sulfide, Fipronil-sulfone, Flamprop-M-isopropyl, Flamprop-M-methyl, Flazasulfuron, Florasulam, Fluazifop (free acid), Fluazifopbutyl, Fluazinam, Flucycloxuron, Flucythrinate, Fludioxonil, Flufenacet, Flufenoxuron, Flumetsulam, Flumioxazin, Fluometuron, Fluoroglycofene-ethyl, Fluoxastrobin, Flupyrsulfuron-methyl, Fluquinconazole, Flurenol, Flurochloridone, Fluroxypyr, Fluroxypyr-meptyl, Flurprimidole, Flurtamone, Flusilazole, Flusulfamide, Fluthiacet methyl, Flutolanil, Flutriafol Fluxofenim, Fomesafen, Fonofos, Foramsulfuron, Formetanate, Fosthiazate, Fuberidazole, Furalaxyl, Furathiocarb, Glufosinate, Halfenprox, Halofenozide, Halosulfuron-methyl, Haloxyfop-etotyl, Haloxyfop-P, Haloxyfop-P-methyl, Heptenophos, Hexaflumuron, Hexazinone, Hexythiazox, Hydramethylnon Imazalil, Imazamethabenz-methyl, Imazapic, Imazapyr, Imazaquin, Imazosulfuron, Imibenconazole, Imidacloprid, Imidacloprid-Olefin, Indoxacarb, Iodosulfuron-methyl sodium, Ioxynil, Iprobenfos, Iprodione, Iprovalicarb, Isazofos, Isafenphos, Isafenphos-oxon Isoprocarb, Isoprothiolane, Isoproturon Isoxaben Isoxadifen-ethyl Isoxaflutole, Isoxathion, Jasmolin, Jasmolin II Kresoxim-methyl lambda-Cyhalothrin, Lenacil, Linuron, Lufenuron, Malaoxon, Malathion, Maleic hydrazide MCPA, MCPA-2-Ethylhexylester, MCPA-butotyl, MCPB, Mecarbam, Mecoprop-P, Mefenacet, Mefenpyr-diethyl, Mepanipyrim, Mepiquat, Mepronil, Mesosulfuron-methyl, Mesotrione, Metalaxyl, Metamitron, Metazachlor, Metconazole, Methabenzthiazuron, Methacrifos, Methamidophos, Methfuroxam, Methidathion, Methiocarb, Methiocarb-sulfoxid, Methomyl, Methomyl-oxime, Methoxyfenozide, Metobromuron, Metolachlor, Metolcarb, Metosulam, Metoxuron, Metrafenone, Metribuzin, Metsulfuron-methyl, Mevinphos, Molinate, Monocrotophos, Monolinuron, Monuron, Myclobutanil, Naled, Napropamide, Neburon, Nicarbazin (1,3- N,N'-bis (4-nitrophenyl)urea), Nicosulfuron, Nicotine, Nitenpyram, Norflurazon, Norflurazon-desmethyl, Novaluron, Nuarimol, Ofurace, Omethoate, Orbencarb, Oxadiargyl, Oxadiazon, Oxadixyl, Oxamyl, Oxamyl-oxime, Oxasulfuron, Oxycarboxin, Oxydemeton-methyl, Oxyfluorfen, Paclobutrazol, Paraoxon, Paraoxon-methyl, Parathion, Parathion-methyl, Pebulate, Penconazole, Pencycuron, Pendimethalin, Permethrin, Pethoxamid, Phenmedipham, Phenthoate, Phorate, Phorat-sulfon Phorat-sulfoxide, Phosalone, Phosmet, Phosphamidon, Phoxim, Picolinafen, Picoxystrobin, Piperonyl butoxide, Piperophos, Pirimicarb, Pirimiphos-ethyl, Pirimiphos-

methyl, Primisulfuron-methyl, Prochloraz, Procymidone, Profenofos, Prohexadione, Promecarb, Prometon, Prometryne, Propachlor, Propamocarb, Propanil, Propaquizafop, Propargite, Propazin-2-hydroxy, Propazine, Propetamphos, Propham, Propiconazole, Propoxur, Propoxycarbazone sodium, Propyzamide, Prosulfocarb, Prosulfuron, Prothioconazole, Prothioconazole, Desthiometabolit, Prothiofos, Pymetrozine, Pyraclofos, Pyraclostrobin, Pyraflufen-ethyl, Pyrazophos, Pyrethrin, IPyrethrin, IIPyridaben, Pyridaphenthion, Pyridate, Pyrifenox, Pyrimethanil, Pyriproxyfen, Pyroquilon, Quinalphos, Quinmerac, Quinoclamine, Quinoxyfen, Quizalofop-ethyl, Quizalofop-P (free acid), Resmethrin, Rimsulfuron, Rotenone, Sebuthylazine, Sebuthylazine-desethyl, Sethoxydim, Siduron, Silthiofam, Simazine, Simazine-2-hydroxy, Simetryn, Spinosyn, A Spinosyn D Spiroxamine, Sulcotrione, Sulfentrazone, Sulfometuron-methyl, Sulfosulfuron, Sulfotep, Sulprofostau-Fluvalinate, Tebuconazol, Tebufenozide, Tebufenpyrad, Tebupirimfos, Tebutam, Tebuthiuron, Teflubenzuron, Temephos TEPP , Tepraloxydim, Terbumeton, Terbutylazine, Terbutylazine-2-hydroxy, Terbutylazine-desethyl, Terbutryn, Tetrachlorvinphos, Tetraconazole, Tetramethrin, Thiabendazole, Thiacloprid, Thiamethoxam, Thidiazuron, Thifensulfuron-methyl, Thiobencarb, Thiodicarb, Thiofanox-sulfone, Thiofanox-sulfoxide, Thiophanate, Thiophanate-methyl, Tolclofos-methyl, Tolyfluanid, Tralkoxydim, Triadimefon, Triadimenol, Tri-allate, Triasulfuron, Triazamate, Triazophos, Triazoxide, Tribenuron-methyl Trichlorfon, Triclopyr, Tricyclazole, Tridemorph, Trietazine, Trifloxystrobin, Triflumizole, Triflumuron, Triflusulfuron-methyl, Trinexapac-ethyl, Triticonazole, Tritosulfuron, Uniconazole, Vamidothion, Warfarin, Ziram

**Table S2.** List of pesticide compounds analyzed by GC-MS in tea

2-Ptenyphenol, 2-keto ethofurnesate, 3,5-Dichloroaniline, Acrinathrin, Aldrin and Dieldrin, Benfluralin, Bifenazate, Bifenox, Bifenthrin, Biphenyl, Boscalid, Bromophos-ethyl, Bromophos-methyl, Bromoprepylate Bupirimate, Buprofezin, Butylate, Cadusafos, Captan, Carbosulfan, Carboxin, Chlorbenside, Chlorbufam, Chlorrdane, Chlorethoxyfos, Chlorfenapyr, Ott Chloropropylate methyl, Chlorfenvinphos, Chlormephos, Chlorobenzilate, Chloroneb, Chloropropylate, Chlorothalonil, Chlorpyrifos-ethyl, Chlorpyrifos -methyl, Chlorthal-dimethyl, Chlorthiamid, Chlozolate, Clothianidin, Cyanofenphos, Cyflufenamid, Cypermethrin, Cypermethrin, DDT, Dialifos, Diazinon, Dichlobenil, Dichlorvos (DDVP), Dicofol, Diethofencarb, Dimethipin, Diniconazole, Dinobuton, Dioxabenzofos, Diphenamed, Diphenylamine, Disulfoton (sum of disulphoton, disulfoton sulfoxide and disulphoton sulfone; in disulphoton), Ditalimfos, Endosulfan (endosulfan-sulphate with alpha and beta isomers; as endosulfan), Endrin, Endrin Ketone, Ethalfluralin, Ethion, Ethofumasate, Ethoprophos, Etoxazole, Etridiazole, Etrimfos, Fenamidone, Fenarimol, Fenbuconazole, Fenchlorphos (sum of fenchlorphos and fenchlorphos oxon; in phenchlorphos), Fenitrothion, Fenoxaprop-P-ethyl, Fenoxaprop-ethyl, Fenpropathrin, Fenson. Fenvalerate (Any ratio of isomers containing Esfenvalerate (RR, SS, RS and SR)), Flucythrinate, Flurmetralin. Filuridone, Flusilazole. Flutriafol, Folpet (Folpet and Phtalimide sum; in folpet), Fonofos, Formothion, Fosthiazate, Halfenprox, Heptachlor (sum of heptachlor and heptachlor epoxide, in heptachlor), Hexachlorobenzene (HCB), Hexachlorocyclohexane (HCH) (sum of isomers excluding gamma isomer) Hexaconazole, Imazalil, Iodofenphos (Jodfenphos), Iprodione, Isodrin, Isofenphos, Kresoxim-methyl, Lambda-Cyhalothrin, Lindane (Hexachlorocyclohexane (HCH) gamma isomer), Mefenpyr-diethyl, Methacrifos, Methidathion, Methoxychlor, Metribuzin, Mirex, Nitrofen, Oxdiazon, oxadixyl, Oxyfluorfen, Parathion ethyl, (Parathion), Parathion-methyl (Sum of parathion-methyl and paraoxon-methyl in terms of Parathion-methyl), Penconazole, Pendimethalin, Pentachloroaniline, Pentachloroanisole, Pentanochlor, Permethrin (sum of isomers), Pethoxamid, Phorate, Phorate Sulfone, Phosmed, Phosphamidon, Procmidone, Profenofos, Propachlor, Propazine, Pyrazophos, Pyridaben, Pyrimethanil, Pyrimidifen, Quinoxifen, Quintozone (PCNB) (sum of quintozene and pentachloroaniline in quintozene), Sulfotep, Tebuconazole, Tebufenpyrad, Tebupirimfos, Tecnazene, Tefluthrin, Terbacil, Terbutryn, Tetrachlorvinphos, Tetraconazole, Tetradifon, Tetrasul, Thiocyclam. Thiometon, Tolclofos-methyl, Triazophos, Tribufos, Trichloronat, Triflumizole, Trifuralin, Triticonazole, Vinclozalin, p,p-dichlorobenzocphenone
